# Supplementary material for: Density Functional Theory Study of Optical and Electronic Properties of (TiO2)n=5,8,68 Clusters for Application in Solar Cells
Source: MDPI journal article supplement (doi:10.3390/molecules26040955), 2021-02-11
Supplement: s1 [file s1]

Article

# Density functional theory study of optical and electronic properties of $(\text{TiO}_2)_{n=5,8,68}$ clusters for application in solar cells

Ife Fortunate Elegbeleye<sup>1</sup>, Nnditshedzeni Eric Maluta<sup>1,2,\*</sup> and Rapela Regina Maphanga<sup>2,3</sup>

<sup>1</sup> Department of Physics, University of Venda, Thohoyandou, South Africa; ifelove778@gmail.com.

<sup>2</sup> National Institute for Theoretical Physics (NITheP), Gauteng, South Africa; Eric.Maluta@univen.ac.za

<sup>3</sup> Next Generation Enterprises and Institutions, Council for Science and Industrial Research, P.O. Box 395, Pretoria, South Africa; rmaphanga@csir.co.za

\* Correspondence: Eric.Maluta@univen.ac.za

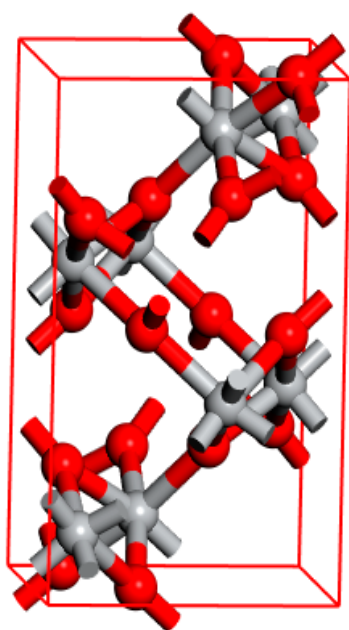

**Figure 1.** Crystallographic forms of  $\text{TiO}_2$  brookite. The atoms are represented according to these colour schemes, grey balls are titanium atoms and red balls are oxygen atoms.

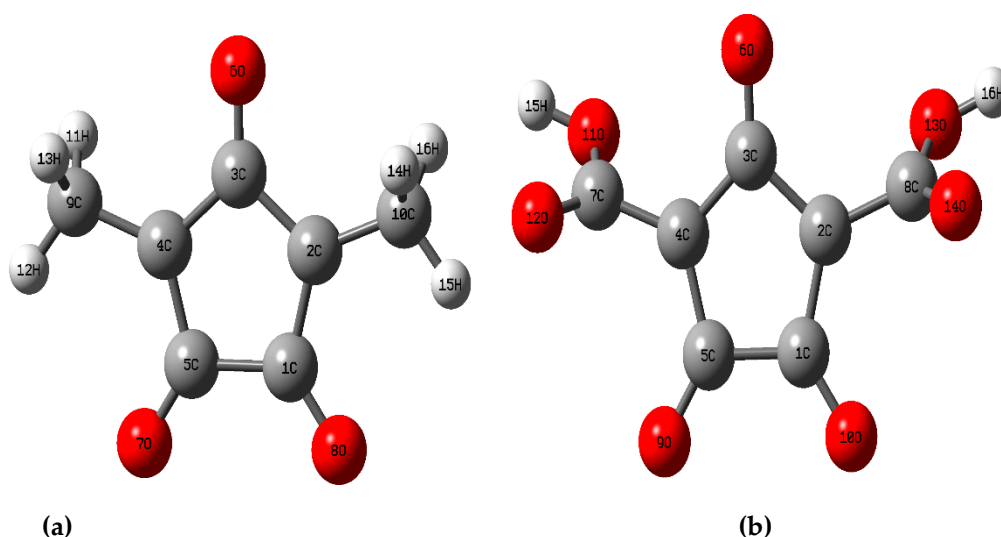

**Figure 2. a)-(b)** (a) CR1 (b) CR2. The atoms are represented according to following colour scheme: grey balls represent titanium atoms, red balls represent oxygen atoms and white ball represent hydrogen atoms.

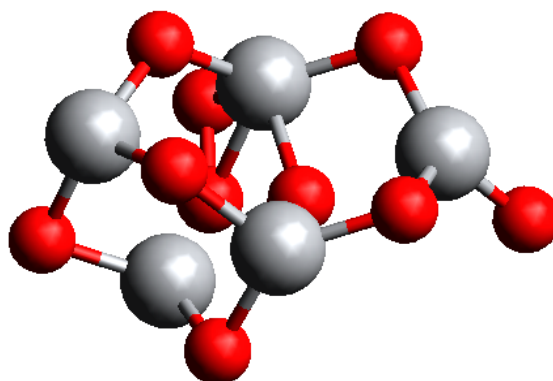

**Figure 3. a).** (TiO<sub>2</sub>)<sub>5</sub> brookite cluster.

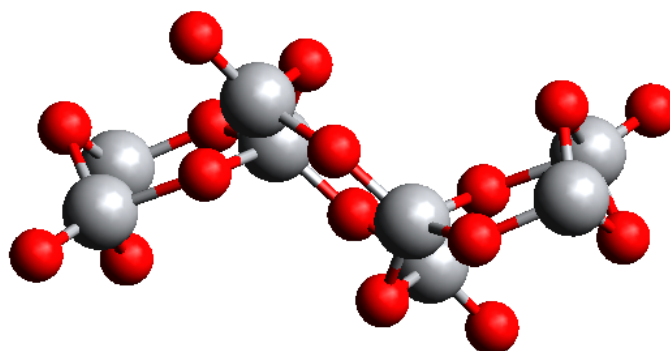

**Figure 3. b).** (TiO<sub>2</sub>)<sub>8</sub> brookite cluster.

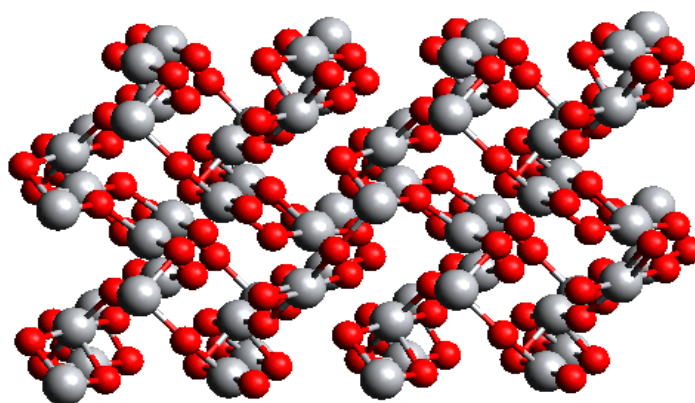

**Figure 3. c).** (TiO<sub>2</sub>)<sub>68</sub> brookite cluster.

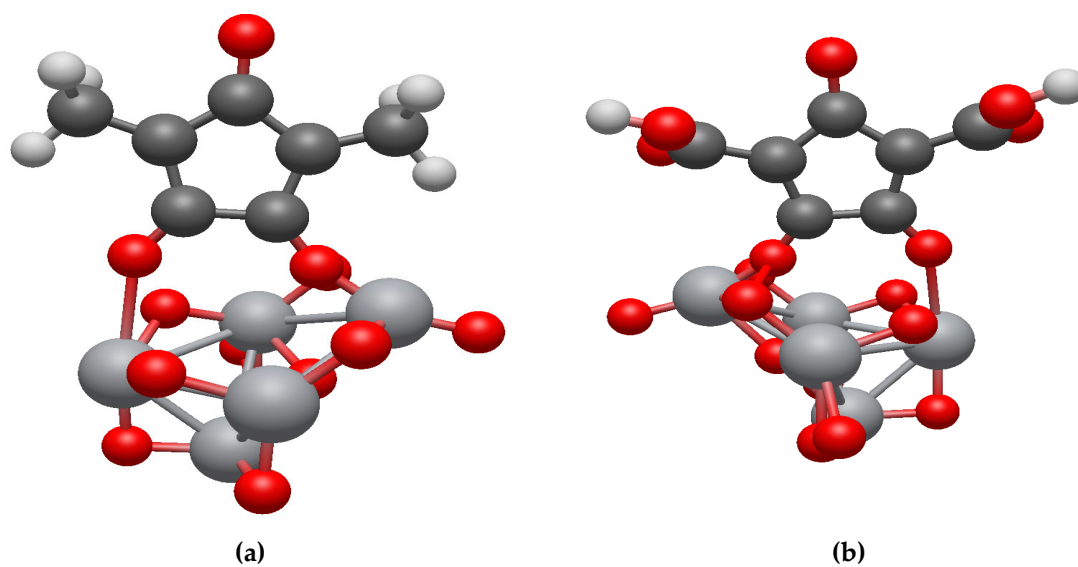

**Figure 4.** Croconate dyes absorbed on  $(\text{TiO}_2)_5$  nanocluster (a) CR1@  $(\text{TiO}_2)_5$  (b) CR2@  $(\text{TiO}_2)_5$ .

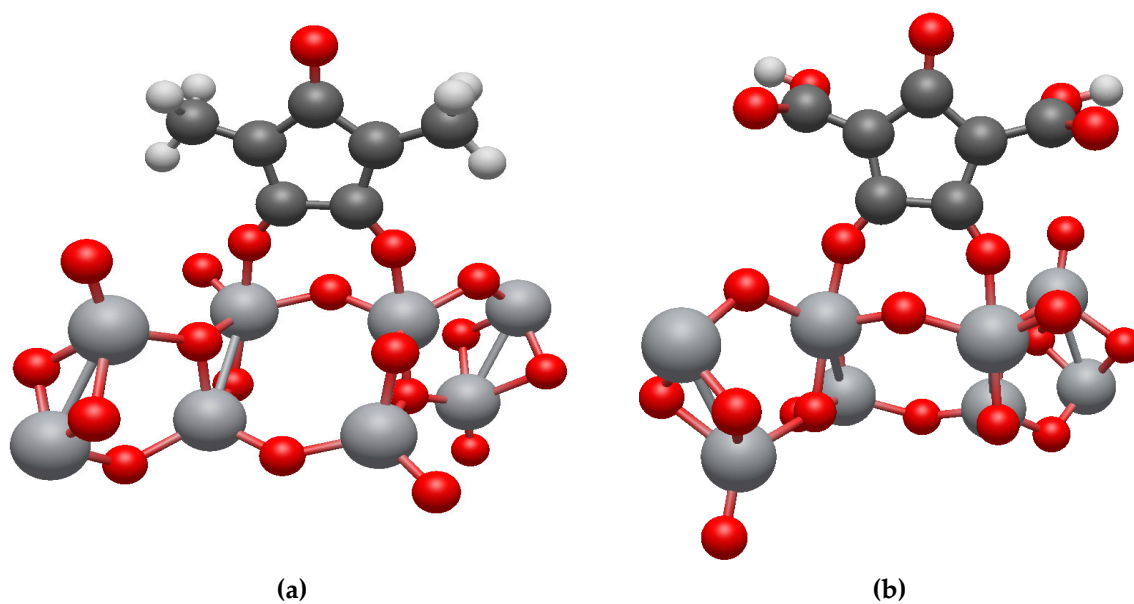

**Figure 5.** Croconate dyes absorbed on  $(\text{TiO}_2)_8$  nanocluster (a) CR1@  $(\text{TiO}_2)_8$  (b) CR2@  $(\text{TiO}_2)_8$ .

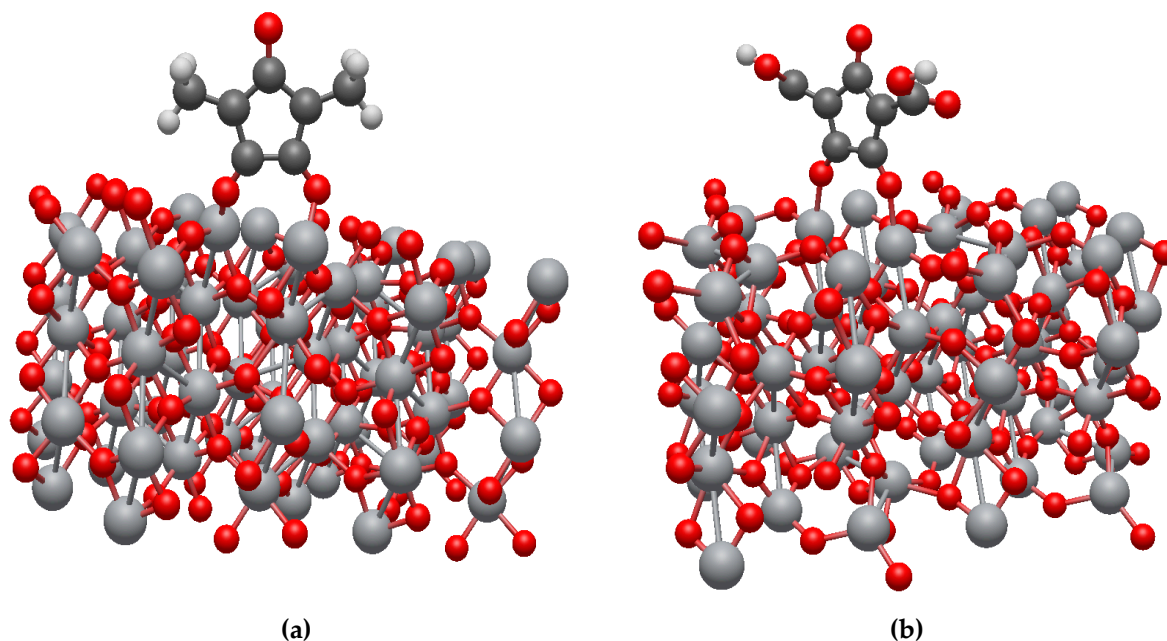

**Figure 6.** Croconate dyes absorbed on  $(\text{TiO}_2)_{68}$  nanoclusters (a)  $\text{CR1}@ (\text{TiO}_2)_8$  (b)  $\text{CR2}@ (\text{TiO}_2)_{68}$ .

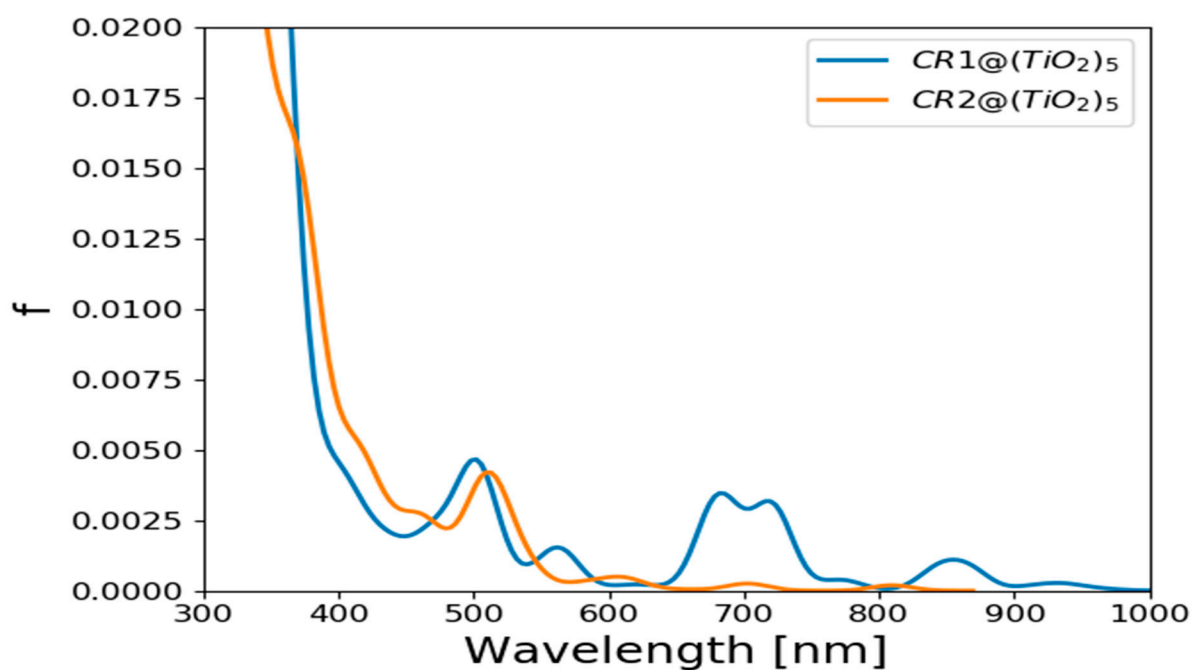

**Figure 7.** Expanded view of simulated UV-Vis spectrum of CR1 and CR2 adsorbed on  $(\text{TiO}_2)_5$  brookite cluster. The oscillator strengths were folded by Gaussians of  $e_{\text{min}}=100$ ,  $e_{\text{max}}=1200\text{nm}$  width. The y-axis is “folded oscillator strength [1/nm].”

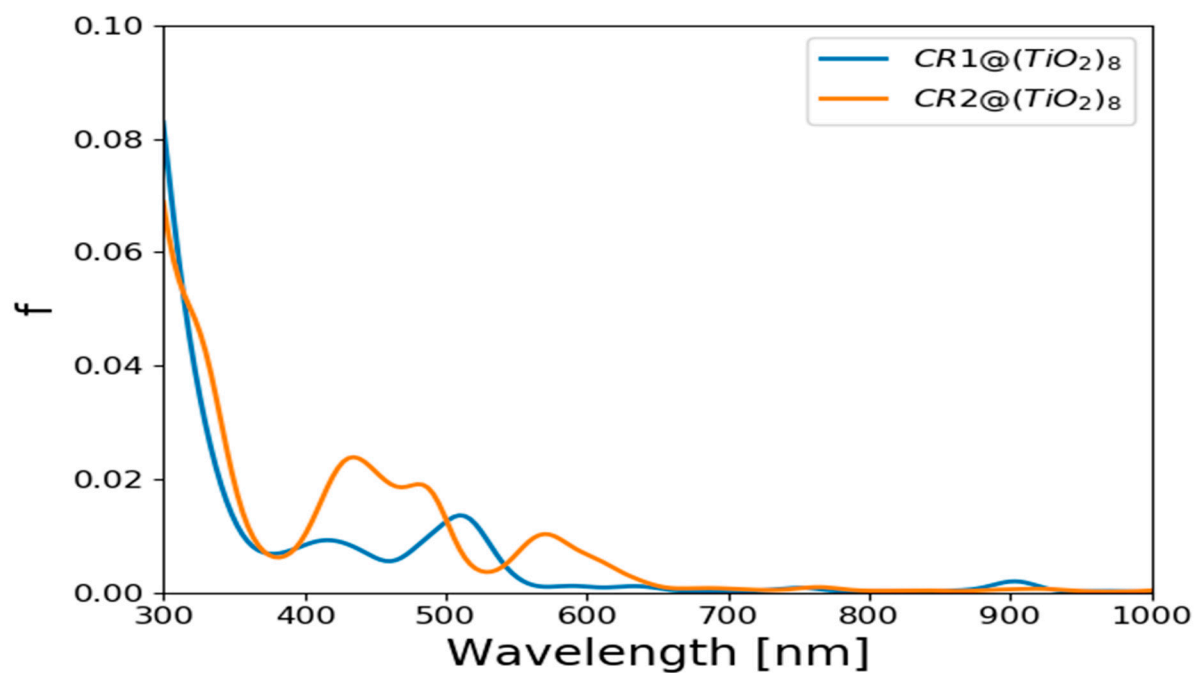

**Figure 8.** Expanded view of simulated UV/Vis absorption spectrum of CR1 and CR2 absorbed on (TiO<sub>2</sub>)<sub>8</sub> brookite cluster. The oscillator strengths were folded by Gaussians of  $e_{min} = 100$ ,  $e_{max} = 1200$  nm width. The y-axis is “folded oscillator strength [1/nm].
